## CARDIAC OUTPUT AS A PREDICTOR OF METABOLIC RATE IN COD *GADUS MORHUA*

D. M. WEBBER<sup>1,2,\*</sup>, R. G. BOUTILIER<sup>2</sup> AND S. R. KERR<sup>1</sup>

<sup>1</sup>Department of Biology, Dalhousie University, Halifax, Nova Scotia, Canada B3H 4J1 and <sup>2</sup>Department of Zoology, University of Cambridge, Downing Street, Cambridge CB1 3EJ, UK

\*e-mail: dmwebber@is.dal.ca

Accepted 6 July; published on WWW 10 September 1998

### Summary

Adult Atlantic cod (2 kg *Gadus morhua*) were fitted with Doppler ultrasonic flow-probes to measure ventral aortic outflow (i.e. cardiac output). The probes remained patent for upwards of 3 months, during which time detailed relationships between cardiac output ( $\dot{Q}$ ), heart rate ( $f_H$ ) and rate of oxygen consumption ( $\dot{M}_{O_2}$ ) were determined as a function of swimming speed and temperature (5 °C and 10 °C). The rate of oxygen consumption increased linearly with  $\dot{Q}$  and exponentially with swimming speed. A very good correlation was observed between  $\dot{M}_{O_2}$  and  $\dot{Q}$  ( $r^2=0.86$ ) compared with the correlation between  $\dot{M}_{O_2}$  and  $f_H$  ( $r^2=0.50$  for all 10 °C data and  $r^2=0.86$  for all 5 °C data). However, the  $\dot{M}_{O_2}$  versus  $f_H$  correlation gradually improved over approximately 1 week after surgery ( $r^2=0.86$ ). The relationship between  $\dot{M}_{O_2}$  and  $\dot{Q}$  was independent of temperature, while the relationship between  $\dot{M}_{O_2}$  and  $f_H$

changed with temperature. Hence, calculating  $\dot{M}_{O_2}$  from  $\dot{Q}$  is simpler and does not require that temperature be recorded simultaneously. Variations in cardiac output were determined more by changes in stroke volume ( $V_s$ ) than by  $f_H$ ; therefore,  $f_H$  was a less reliable predictor of metabolic rate than was  $\dot{Q}$ . Given that  $\dot{Q}$  can be used to estimate  $\dot{M}_{O_2}$  so faithfully, the advent of a cardiac output telemeter would enable robust estimates to be made of the activity metabolism of free-ranging fish in nature, thereby strengthening one of the weakest links in the bioenergetic models of fisheries biology.

Key words: *Gadus morhua*, Atlantic cod, oxygen consumption, cardiac output, heart rate, stroke volume, bioenergetics, metabolism, fish.

### Introduction

In fisheries biology, bioenergetic models for the analysis of fish production systems are quite advanced (e.g. Kitchell *et al.* 1977; Kerr, 1982; Krohn *et al.* 1997). Such models take the form of a steady-state energy equation in which the total amount of energy consumed is balanced by the total amount of energy expended through respiration, activity metabolism, food digestion and assimilation, together with waste losses and somatic and gonadal growth. Bioenergetic models have been shown to apply to a wide variety of ecological problems (Hansen *et al.* 1993; Hewett, 1989; Kitchell *et al.* 1977) and have been applied specifically to Atlantic cod (*Gadus morhua*) (Krohn *et al.* 1997). Whereas the growth component can be estimated with relative ease, the ration intake and metabolic components (standard and active metabolic rates) are difficult to estimate in the field and require numerous approximations and assumptions (Kerr, 1982; Kerr and Dickie, 1985; Boisclair and Leggett, 1989; Ney, 1993).

The ability to telemeter physiological information from free-ranging animals in nature promises to open up many new areas of research into animal energetics. There have been several attempts to estimate the activity metabolic rate of free-ranging animals by taking telemetered measures of their heart rate ( $f_H$ )

and converting them into the rate of oxygen consumption ( $\dot{M}_{O_2}$ ) using equations derived from calibration experiments (i.e.  $f_H$  versus  $\dot{M}_{O_2}$ ) carried out in the laboratory (e.g. Butler, 1993; Lucas *et al.* 1993; Bevan *et al.* 1995). Such estimates are far more reliable for birds and mammals (Butler *et al.* 1995) than they are for most fish, since cardiac output ( $\dot{Q}$ ) in endotherms is modulated primarily through changes in heart beat frequency ( $f_H$ ) rather than stroke volume ( $V_s$ ). Given that cardiac output in fish is determined largely by  $V_s$  (Stevens and Randall, 1967; Randall, 1968; Kiceniuk and Jones, 1977) and that:

$$\dot{M}_{O_2} = f_H \times V_s \times (Ca_{O_2} - Cv_{O_2}), \quad (1)$$

one could only expect robust relationships between  $f_H$  and  $\dot{M}_{O_2}$  in circumstances where stroke volume ( $V_s$ ) and the arterial-venous  $O_2$  content difference ( $Ca_{O_2} - Cv_{O_2}$ ) either remained constant or varied systematically. Indeed, this is probably why  $f_H$  and  $\dot{M}_{O_2}$  can be so highly correlated in some species of free-swimming fish (Wardle and Kanwisher, 1974; Armstrong, 1986, 1998; Sureau and Lagardere, 1991; Lucas, 1994) and not in others (Priede and Tytler, 1977; Sureau and Lagardere, 1991; Claireaux *et al.* 1995a,b).

In terms of increased oxygen demands from swimming,  $f_H$

is often not well correlated with metabolic rate and its control is not completely understood. Priede and Tytler (1977) observed a large range of  $\dot{M}_{O_2}$  for a given  $f_H$  in rainbow trout (*Oncorhynchus mykiss*), brown trout (*Salmo trutta*) and cod. This variability is presumably due to a large range of  $V_s$  for a given  $f_H$ . Heart rate has been used to estimate energy expenditure of brown trout (Priede and Young, 1977; Priede, 1983) and pike (*Esox lucius*) (Lucas *et al.* 1991, 1993) in nature but, according to Thorarensen *et al.* (1996a), the accuracy of these estimates is questionable. Thorarensen *et al.* (1996a) state that the relationship between  $\dot{M}_{O_2}$  and  $f_H$  is described by numerous curves subject to the physiological condition of a fish and to environmental factors.

During steady-state swimming, the rate of oxygen uptake of fish increases considerably, to as much as 15 times the value at standard metabolic rate in sockeye salmon (*Oncorhynchus nerka*) (Brett and Glass, 1973). The cardiovascular system meets oxygen uptake demands by increasing  $\dot{Q}$  and by utilizing more of the oxygen in the blood. Since  $\dot{Q}$  is the product of the volume of blood pumped for each contraction ( $V_s$ ) and the frequency of pumping ( $f_H$ ), one would expect  $\dot{Q}$  to be highly correlated with the rate of oxygen uptake. Although  $\dot{Q}$  and  $\dot{M}_{O_2}$  have been measured in fish a number of times, there have been no direct and long-term simultaneous measurements of both  $\dot{Q}$  and  $\dot{M}_{O_2}$  in actively swimming fish. Studies that have reported a relationship between  $\dot{Q}$  and  $\dot{M}_{O_2}$  use indirect determinations of  $\dot{Q}$  or  $\dot{M}_{O_2}$ , through solution of the Fick equation (see above) (Goldstein *et al.* 1964; Lenfant and Johansen, 1966; Robin *et al.* 1966; Baumgarten-Schulmann and Piiper, 1968; Garey, 1970; Hanson and Johansen, 1970; Holeyton, 1970; Cech *et al.* 1976; Kiceniuk and Jones, 1977; White *et al.* 1988; Takeda, 1993; Korsmeyer *et al.* 1997b).

The objectives of this study are to determine precisely the relationship between  $\dot{M}_{O_2}$  and cardiac variables in cod, over a range of temperature, as a necessary step in developing an ultrasonic telemetering transmitter that allows the measurement of  $\dot{Q}$  in free-swimming fish. The development of such a transmitter will permit more accurate estimates of the metabolic rate of free-swimming fish in nature, enabling quantification of the effects of external factors on fish growth and production. We describe laboratory results on the efficacy of cardiac output as a predictor of the metabolic rate of Atlantic cod as an essential prerequisite to the development of such a transmitter.

### Materials and methods

Approximately 60 Atlantic cod (*Gadus morhua* L.) (mean mass 1.91 kg) were acquired from Eastern Passage, Nova Scotia (63°25' W, 44°34' N) in the autumn of 1993 and from nearby Sambro Fisheries in the autumn of 1995. The animals were transported in aerated fresh sea water to the laboratory at Dalhousie University and maintained in ambient and temperature-controlled sea water between 5 and 10 °C and at 30–32‰ salinity under a controlled photoperiod (12h:12h L:D). The cod were fed a diet of frozen mackerel (*Scomber*

*scombrus*) and squid (*Loligo opalescens*), twice a week before experimentation. To eliminate the effect of feeding on metabolic rate, the cod were not fed for 1 week prior to surgery and before and during swimming trials. The cod were never fed to satiation, and a meal never exceeded 2.5 % of body mass. We limited the animals used here to a mass range of 1.6–2.2 kg to minimize any possible scaling effects of mass on the rate of oxygen consumption ( $\dot{M}_{O_2}$ ), cardiac output ( $\dot{Q}$ ) and heart rate ( $f_H$ ).

### Swimming metabolic rate

The experiments were conducted at 5 °C and 10 °C on individual fish using a 'Brett-style' swimming respirometer (Brett, 1964) described in detail in Webber (1985) and Webber and O'Dor (1986). The water volume was 89 l, and water currents were generated by a centrifugal pump capable of producing water velocities up to 2 m s<sup>-1</sup>. A computerized control system enabled temperature control to ±0.05 °C. Chilled (2 °C) and heated (20 °C) seawater lines gave flexibility in setting temperatures. A brief description of the working system is as follows. Within the toroidal-shaped acrylic pipe, a fish confined to a straight section 0.2 m in diameter × 1.2 m in length was forced to swim against the current. Oxygen depletion was measured in a parallel external water circuit using a Radiometer  $P_{O_2}$  electrode (Radiometer Inc., Copenhagen) and Endeco/YSI, model 1125, pulsed oxygen analyzer and electrode (YSI, Yellow Springs Instruments, Ohio, USA). Changes in oxygen concentration were not detected in the absence of test fish. The water circuit provided a constant flow over the oxygen probes and facilitated calibration of the oxygen system. All sensor inputs (oxygen, temperature, cardiac output) were acquired in digital format and transformed into real units. Doppler blood flow inputs were sampled continuously at 50 Hz. The rate of oxygen consumption was adjusted to a standard body mass of 1 kg using the mass exponent of 0.8 determined by Saunders (1963):

$$\dot{M}_{O_2(1\text{ kg})} = (1/M_b)^{0.8} \dot{M}_{O_2}, \quad (2)$$

where  $M_b$  is body mass.

Many studies of swimming energetics use a 'critical speed' protocol defined by Brett (1964) in which the animal is swum, starting at 0 m s<sup>-1</sup>, at stepwise increases in velocity until it fatigues. The problem with this technique is that the researcher cannot deviate from the fixed incremental protocol even if the animal appears stressed, overactive or inactive. Rather than following a fixed time procedure, our protocol involved swimming the animal at any water speed between 0.08 and 0.7 m s<sup>-1</sup> for approximately 1–1.5 h at each speed. The cod were allowed to rest for 1–2 h between swimming trials and overnight. The water velocity was corrected for the acceleration of water around the fish according to the method of Webb (1974). The animal was monitored on a video monitor.

Approximately 1 week prior to surgery, the animal was tested in the respirometer. During this time, fish were exposed to various water currents, providing a control to compare with

post-surgery swimming performance and to acclimate the animal to the chamber. The rate of oxygen consumption, tailbeat frequency and water speed were measured during all swimming trials before and after surgery. Cardiac output and  $f_H$  were measured after surgery. Every effort was made to minimize stress. The animals were not exposed to an electric grid and were seldom prodded to encourage activity. Reported values are means  $\pm$  standard error of the mean.

#### Surgery

Cod were anaesthetized with  $0.05 \text{ g l}^{-1}$  tricaine methanesulphonate (MS-222), weighed, measured and transferred to an operating sling immersed in oxygenated and temperature-controlled sea water. The gills were continuously bathed with aerated sea water and  $0.025 \text{ g l}^{-1}$  MS-222. The ventral aorta was exposed *via* a 1.5 cm long and approximately 3 cm deep incision. Cardiac output was measured using a Doppler ultrasonic flow probe and a directional pulsed Doppler flowmeter (Bioengineering, University of Iowa, USA). The Doppler crystal was pre-mounted at  $45^\circ$  in the flow probe. A flow probe (3–4 mm inside diameter) was chosen to match the diameter of the ventral aorta as closely as possible. The tubing was then fitted around the ventral aorta and fixed in place with silk or braided polyglycolic acid ligature. A 10 cm long 14 gauge needle was used to lead the wires under the skin from the incision, behind the pectoral fin, to emerge at the base of the dorsal fin. To minimize infection, antibiotics were applied to the wound before completely closing the incision using sutures.

Two calibration techniques were used to determine blood flow from the Doppler blood speed signal. One technique involved excising the heart and perfusing the atrium, ventricle and aorta with perfusate at known flow rates. The other technique, performed on four cod, involved calibrating the flow probe using latex tubing of known inside diameter and blood flow rate. Human or fish whole blood or Cephalexin particles ( $20 \mu\text{m}$  diameter) were used for the calibration. The velocity of the blood was measured, at  $45^\circ$  to the direction of flow, at various distances across the tubing. This velocity profile was measured at different flow rates. Once the probe had been implanted, the velocity profile of the ventral aortic blood was measured daily, thus calibrating blood flow (Fig. 1A). Both techniques yielded comparable flow/voltage ratios. A comparison of the two techniques is illustrated in Fig. 1B. The equation relating blood flow ( $\text{ml min}^{-1}$ ) for the two techniques was linear with a slope near 1 and the coefficient of determination ( $r^2$ ) was 0.90 ( $N=4$ ;  $P<0.0001$ ).

After the 30–60 min operation, the cod were placed in the swimming respirometer to commence recovery. Data were collected immediately after surgery; however, fish were not exercised until the next day. Extreme care was taken to avoid disturbing the animal. To measure metabolic rates and  $\dot{Q}$  over the long term, 60% ( $N=4$ ) of the animals were kept in the respirometer for up to 3 months. The remainder ( $N=3$ ) were kept for 2 weeks to 1 month. Initially, cod were tested at  $10^\circ\text{C}$  for 2 weeks, acclimated to  $5^\circ\text{C}$  over a 3 week period and then

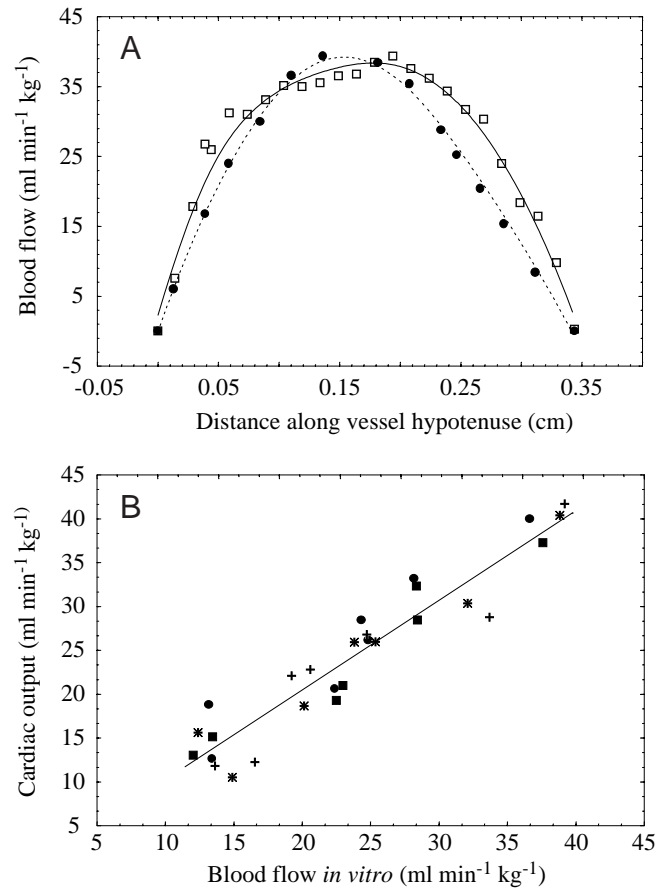

Fig. 1. (A) Comparison of blood flow ( $\dot{V}_b$ ) through a tube (filled circles) and through the ventral aorta (open squares) of a cod (*Gadus morhua*) *in vivo*. The lines were fitted using distance-weighted least-squares smoothing. (B) The relationship between cardiac output ( $\dot{Q}$ ) calculated *in vivo* in resting or swimming fish and  $\dot{Q}$  measured using *in vitro* ventral aortic perfusion. Different symbols are for different fish.  $\dot{Q}(\text{in vivo}) = -0.049 + 1.026\dot{V}_b(\text{in vitro})$ ;  $r^2 = 0.90$ ;  $P < 0.0001$ ;  $N = 4$ .

tested at  $5^\circ\text{C}$ . Over this time, other acute temperature and feeding experiments were performed. It is important to note that the same animals were used for both temperature trials.

#### Results

The cod were able to maintain an upright position after 1 h of recovery from surgery in sea water. Physiological recovery was judged to take from 2 to 7 days after surgery on the basis of the resting heart rate ( $f_H$ ) values. During the first 24 h after surgery,  $f_H$  generally exceeded the maximum values observed during swimming ( $46$  versus  $40$  beats  $\text{min}^{-1}$ ). After 1 week of post-operative recovery, the  $f_H$  for resting cod decreased to approximately  $28.3 \pm 0.53$  beats  $\text{min}^{-1}$  ( $N=6$ ) and remained consistently at that level for the duration of the experiment at  $10^\circ\text{C}$ . Also, most of the animals accepted food after 1 week, suggesting that recovery was near complete. The condition factor (mass/length<sup>3</sup>) of the cod used in this study was higher than that observed in cod in nature. Condition factor is

generally accepted as an indication of the general health of an animal. The level of activity or observed spontaneous movements of cod in the respirometer did not appear to be different before and after surgery.

*Oxygen consumption, swimming speed, cardiac output, stroke volume and heart rate*

Cod were exercised in the respirometer at 5 and 10 °C. All animals were able to maintain their positions in the swimming chamber and swam steadily at low speeds. At higher speeds, water velocity was lowered if animals began to 'burst swim' (i.e. to show sporadic rapid accelerations). In no instances did the animals become exhausted. We refer to this level of activity as 'maximum activity'. The linear relationship between swimming speed and tailbeat frequency suggested that the animals were swimming smoothly (Fig. 2A;  $r^2=0.85$ ;  $P<0.0001$ ). This relationship confirmed that the respirometer provided reproducible swimming exercise. The rate of oxygen consumption was also correlated with tailbeat frequency (Fig. 2B;  $r^2=0.67$ ;  $P<0.0001$ ).

The rate of oxygen consumption ( $\dot{M}_{O_2}$ ) as a function of

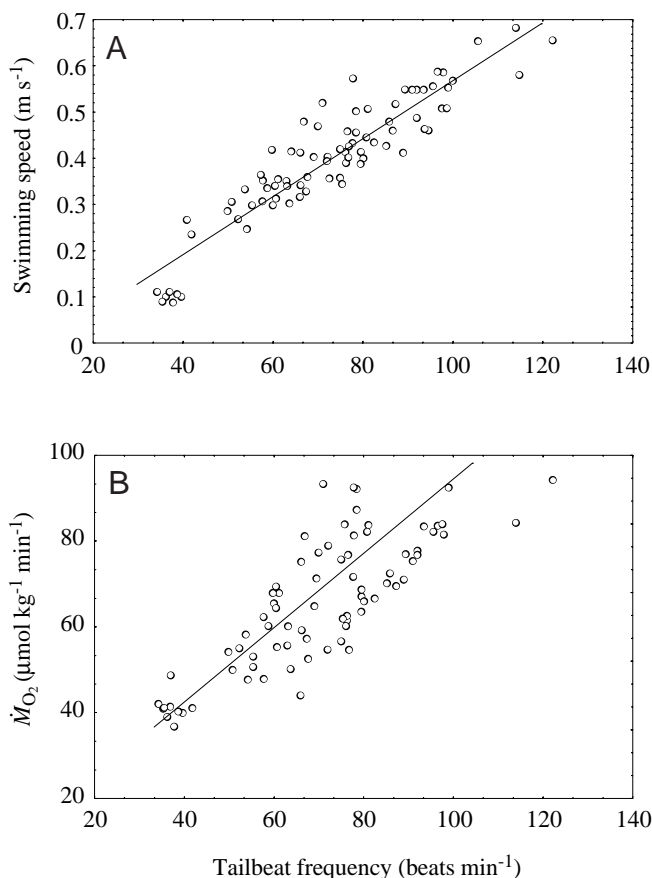

Fig. 2. (A) The relationship between swimming speed ( $U$ ) and tailbeat frequency  $f_{TB}$  in cod ( $U=0.02+0.0053f_{TB}$ ;  $r^2=0.85$ ;  $P<0.0001$ ;  $N=9$ ). (B) The relationship between the rate of oxygen consumption ( $\dot{M}_{O_2}$ ) and tailbeat frequency ( $\dot{M}_{O_2}=20+0.648f_{TB}$ ;  $r^2=0.67$ ;  $P<0.0001$ ;  $N=9$ ) in cod *Gadus morhua* at 10 °C.

swimming speed for fish equipped with cardiac output ( $\dot{Q}$ ) flow probes is shown in Fig. 3. A regression line of the form  $\dot{M}_{O_2}=ab^U$  was fitted, where  $a$  is the value of ( $\dot{M}_{O_2}$ ) at zero velocity (the standard metabolic rate;  $\mu\text{mol kg}^{-1} \text{min}^{-1}$ ) and  $U$  is the swimming speed in  $\text{m s}^{-1}$ . The correlation coefficient for this relationship for each individual was always higher when fitted to logarithmic than to linear coordinates, and the pooled data also gave a slightly higher correlation for a logarithmic model than for a linear model. The predicted values for standard metabolic rate and active metabolic rate were  $35\pm 1.2$  and  $97\pm 2.3 \mu\text{mol O}_2 \text{kg}^{-1} \text{min}^{-1}$  at 10 °C ( $r^2=0.9$ ;  $P<0.0001$ ;  $N=9$ ) and  $22\pm 2.0$  and  $72\pm 5.0 \mu\text{mol O}_2 \text{kg}^{-1} \text{min}^{-1}$  at 5 °C ( $r^2=0.91$ ;  $P<0.0001$ ;  $N=7$ ). These values correspond to swimming at 0 and approximately 1 body length  $\text{s}^{-1}$  and they can be used to calculate the metabolic facultative scope for activity; i.e. the difference between maximum and standard  $\dot{M}_{O_2}$  ( $62 \mu\text{mol O}_2 \text{kg}^{-1} \text{min}^{-1}$  at 10 °C and  $50 \mu\text{mol O}_2 \text{kg}^{-1} \text{min}^{-1}$  at 5 °C). The  $Q_{10}$ , between 5 and 10 °C, for metabolic rate was 2.5 at rest and 2.1 at maximum activity.

The interactions between  $\dot{M}_{O_2}$ , temperature and the cardiovascular variables are illustrated in Figs 4–6. At 10 °C, from rest to maximum activity,  $\dot{Q}$  increased by 192 % from  $12\pm 0.74$  to  $35\pm 2.6 \text{ml kg}^{-1} \text{min}^{-1}$  ( $N=7$ ) (Fig. 4),  $f_H$  by 43 %

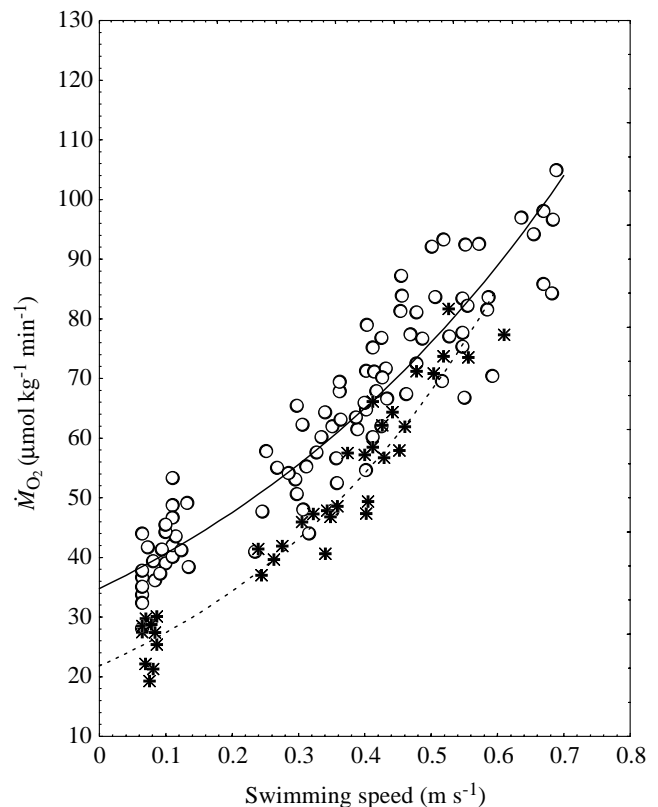

Fig. 3. The relationship between the rate of oxygen consumption ( $\dot{M}_{O_2}$ ) and swimming speed ( $U$ ) in cod *Gadus morhua* at 5 °C (asterisks) ( $\dot{M}_{O_2}=21.8\times 9.72^U$ ;  $r^2=0.91$ ;  $P<0.0001$ ;  $N=7$ ) and 10 °C (open circles) ( $\dot{M}_{O_2}=34.8\times 4.79^U$ ;  $r^2=0.90$ ;  $P<0.0001$ ;  $N=9$ ).

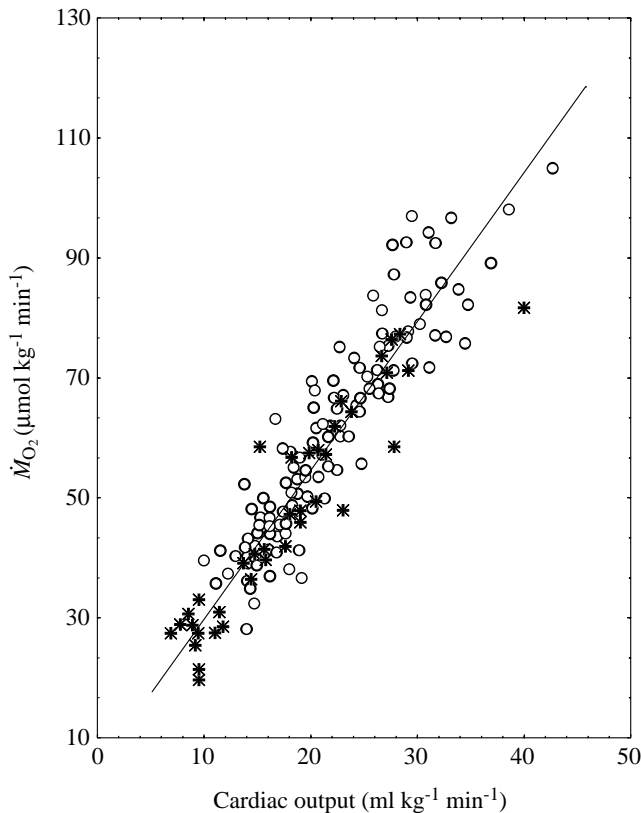

Fig. 4. The relationship between the rate of oxygen consumption ( $\dot{M}_{O_2}$ ) and cardiac output ( $\dot{Q}$ ) in cod *Gadus morhua* at 10 °C (open circles) and 5 °C (asterisks) ( $\dot{M}_{O_2}=5.6+2.46\dot{Q}$ ;  $r^2=0.86$ ;  $P<0.0001$ ;  $N=7$ ). An analysis of variance with regression for the 5 and 10 °C data revealed that the slopes and intercepts were not significantly different ( $P>0.6$ ).

from  $28\pm 0.84$  to  $40\pm 0.81$  beats  $\text{min}^{-1}$  ( $N=7$ ) (Fig. 5) and stroke volume ( $V_s$ ) by 100 % from  $0.45\pm 0.03$  to  $0.88\pm 0.047$   $\text{ml kg}^{-1}$  ( $N=7$ ) (Fig. 6). At 5 °C,  $\dot{Q}$  increased by 240 % from  $9\pm 0.87$  to  $31\pm 2.9$   $\text{ml kg}^{-1} \text{min}^{-1}$ ,  $f_H$  by 72 % from  $16\pm 0.41$  to  $28\pm 1.0$  beats  $\text{min}^{-1}$  and  $V_s$  by 120 % from  $0.515\pm 0.04$  to  $1.12\pm 0.06$   $\text{ml kg}^{-1}$ . From rest to maximum activity,  $V_s$  constituted 69 % of the increase in  $\dot{Q}$  at 10 °C and 62 % at 5 °C. The  $\dot{M}_{O_2}$  versus  $\dot{Q}$  relationship had a much higher correlation ( $r^2=0.86$ ) at 10 °C (Fig. 4) than the  $\dot{M}_{O_2}$  versus  $f_H$  relationship ( $r^2=0.50$ ) (Fig. 5; dotted line).

When the  $\dot{M}_{O_2}$  versus  $f_H$  relationship was examined on a day-to-day basis following surgery, the slope of the line remained constant but the line shifted to the left such that, over time,  $\dot{M}_{O_2}$  increased for the same  $f_H$ . Indeed, heart rate decreased from approximately 46 to 28 beats  $\text{min}^{-1}$  (at rest) over the first week following surgery. The downward trend in  $f_H$  is clearly illustrated in Fig. 7. Immediately after surgery,  $f_H$  was higher than that observed at maximum levels of swimming activity (approximately 40 beats  $\text{min}^{-1}$ );  $f_H$  took upwards of 8–10 days to stabilize eventually at 28 beats  $\text{min}^{-1}$ . As the fish recovered, heart rate decreased progressively as  $\dot{Q}$  increased, corresponding to a gradual increase in  $V_s$ . On any given day,

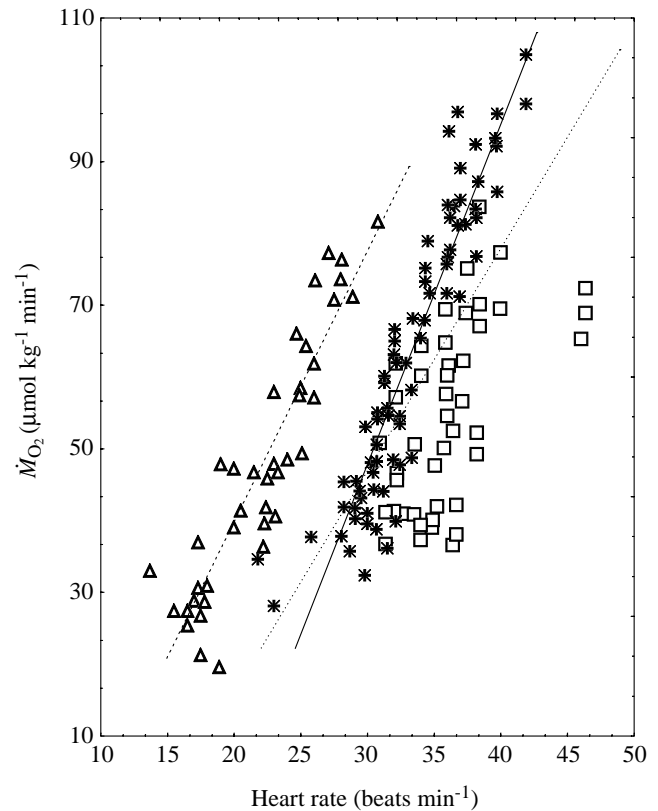

Fig. 5. The relationship between the rate of oxygen consumption ( $\dot{M}_{O_2}$ ) and heart rate ( $f_H$ ) in cod *Gadus morhua* at 5 °C (open triangles, dashed line) ( $\dot{M}_{O_2}=-35.5+3.75f_H$ ;  $r^2=0.86$ ;  $P<0.0001$ ;  $N=5$ ) and at 10 °C (open squares and asterisks). The open squares represent data collected less than 7 days after surgery, and the asterisks represent data collected more than 7 days after surgery. The solid line drawn through the asterisks is represented by the equation  $\dot{M}_{O_2}=-92.7+4.69f_H$ ;  $r^2=0.86$ ;  $P<0.0001$ ;  $N=7$ . The combined data at 10 °C represented by the asterisks and open squares (dotted line) yield the relationship  $\dot{M}_{O_2}=-44.7+3.07f_H$ ;  $r^2=0.50$ ;  $P<0.0001$ ;  $N=7$ .

the relationship between  $\dot{M}_{O_2}$  and  $f_H$  can be very highly correlated, and if the  $f_H$  data from 'recovered' (greater than 7 days post-surgery) cod only are related to  $\dot{M}_{O_2}$  (Fig. 5, asterisks), the relationship ( $r^2=0.86$ ;  $P<0.0001$ ) is as strong as that between  $\dot{M}_{O_2}$  and  $\dot{Q}$ . During the recovery period, the  $\dot{M}_{O_2}$  versus  $\dot{Q}$  relationship did not change appreciably.

#### High-resolution measurements of activity

Fig. 8 illustrates the  $\dot{Q}$  of a resting cod that initially gently beat its pectoral fins, then stopped for 15 min before restarting again at 0.63 Hz. Generally, while resting, cod spontaneously beat their pectorals or caudal fin for short periods and, as a result, true resting rates of  $\dot{Q}$  are difficult to measure. The response of  $\dot{Q}$  to the beating pectoral fins was similar to that observed when a cod flexes its tail and starts to swim. Cardiac output did not rise immediately after the onset of exercise but took up to 10 min before stabilizing. If we assume that the drop in  $\dot{Q}$  when pectoral fin beating stopped was related to the

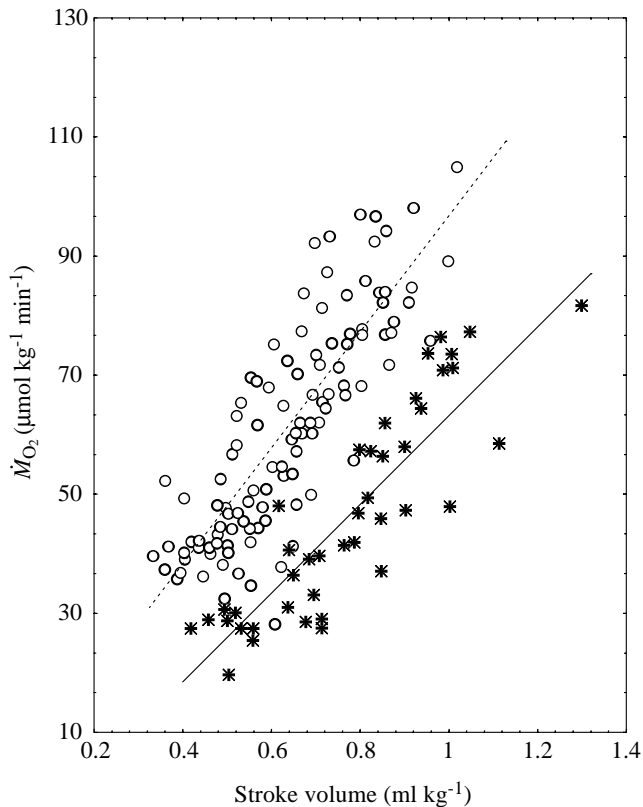

Fig. 6. The relationship between the rate of oxygen consumption ( $\dot{M}_{O_2}$ ) and stroke volume ( $V_s$ ) in cod *Gadus morhua* at 5°C (asterisks; solid line) ( $\dot{M}_{O_2} = -12.4 + 75.3V_s$ ;  $r^2 = 0.71$ ;  $P < 0.0001$ ;  $N = 5$ ) and at 10°C (open circles; dashed line) ( $\dot{M}_{O_2} = -2.6 + 98.7V_s$ ;  $r^2 = 0.70$ ;  $P < 0.0001$ ;  $N = 7$ ).

drop in  $\dot{M}_{O_2}$ , then the cost of pectoral fin beating can be estimated from the  $\dot{M}_{O_2}$  versus  $\dot{Q}$  relationship. We used  $12.7 \text{ ml kg}^{-1} \text{ min}^{-1}$  as a baseline value of  $\dot{Q}$ , estimated the drop in  $\dot{Q}$  from Fig. 8 and calculated  $\dot{M}_{O_2}$  (from Fig. 4) to be 3.4% of total metabolic rate or 5.6% of the aerobic scope.

## Discussion

### $\dot{M}_{O_2}$ and cardiac variables

Our data indicate that cardiac output ( $\dot{Q}$ ) shows great promise as a tool to estimate metabolic rate for use in bioenergetic models of free-swimming fish in nature. Certainly,  $\dot{Q}$  is a much more robust and reliable indicator of  $\dot{M}_{O_2}$  than is  $f_H$ . For example, the  $\dot{M}_{O_2}$  versus  $\dot{Q}$  relationship was independent of time after surgery and of temperature and was linear over a range of activity levels (Fig. 4). In contrast the  $\dot{M}_{O_2}$  versus  $f_H$  relationship depended on both temperature and time after surgery in terms of intercept but not slope (Fig. 5).

We stress that, by using a  $\dot{M}_{O_2}$  versus  $f_H$  calibration from the recovery period,  $\dot{M}_{O_2}$  can be overestimated by as much as 100%. Thorarensen *et al.* (1996a) state that the relationship between  $\dot{M}_{O_2}$  and  $f_H$  is subject to change depending on the physiological condition of a fish and environmental factors.

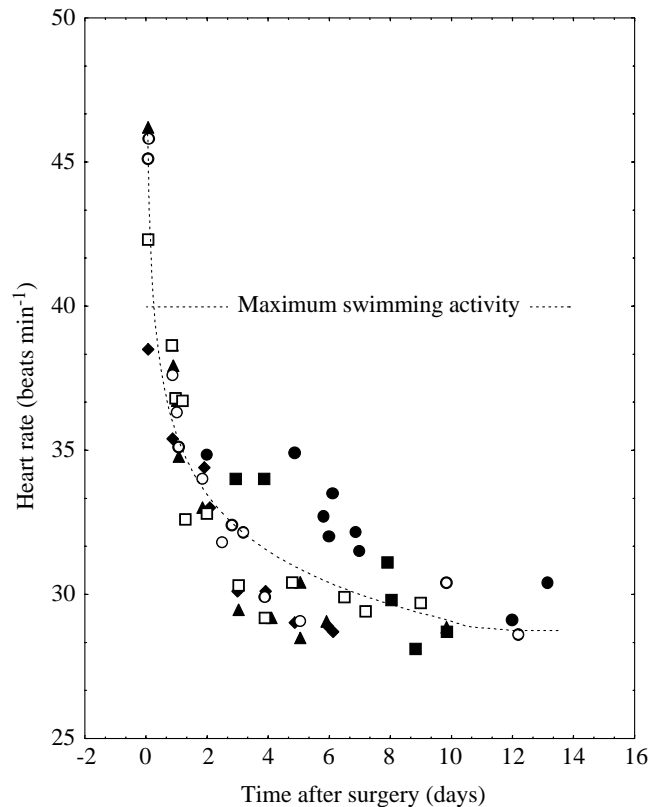

Fig. 7. Heart rate ( $f_H$ ) plotted against time ( $t$ ) after surgery for resting cod *Gadus morhua* at 10°C ( $f_H = 35.6t^{-0.873}$ ;  $r^2 = 0.81$ ;  $P < 0.0001$ ;  $N = 6$ ). Each different symbol represents a different fish. The mean value of  $f_H$  at maximum swimming activity is indicated.

They present evidence that several  $\dot{M}_{O_2}$  versus  $f_H$  curves exist in the literature for the same species and, as a result, they have proscribed the use of  $f_H$  as a useful tool for measuring the metabolic rate of fish in nature. However, we would like to point out that, if fish are allowed to recover fully from surgery and if individuals are calibrated before release into nature rather than predicting  $\dot{M}_{O_2}$  from  $f_H$  at a population level, then many of the concerns of Thorarensen *et al.* (1996a) can probably be ameliorated. Our results demonstrate that the relationship between  $\dot{M}_{O_2}$  and  $f_H$ , for cod, is temperature-dependent and are in agreement with Claireaux *et al.* (1995a). Claireaux *et al.* (1995a) also observed that the  $\dot{M}_{O_2}$  versus  $f_H$  relationship varied with seawater oxygen saturation. Temperature can easily be measured in the laboratory and telemetered in the field. We suggest that, for cod,  $f_H$  can be useful under known conditions of temperature, oxygen level and salinity in fully recovered animals; however, the use of  $f_H$  as a predictor of  $\dot{M}_{O_2}$  will be subject to uncertainty for a free-ranging animal patrolling large volumes of water through changing fields of temperature and changing oxygen and salinity levels.

Clearly, surgically induced trauma affects  $f_H$ . Presumably, earlier studies that report poor correlations between  $\dot{M}_{O_2}$  and  $f_H$  have not considered the physiological effects of surgical

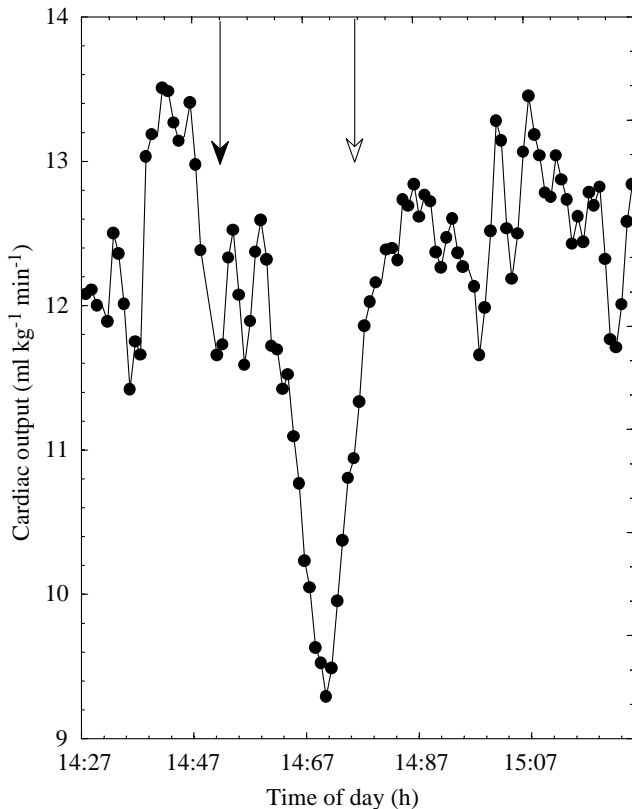

Fig. 8. Cardiac output ( $\dot{Q}$ ) plotted against time of day for a resting cod *Gadus morhua* at 10 °C. The solid arrow indicates the time when the cod stopped beating its pectoral fins and the open arrow indicates when it started to beat its pectoral fins at 0.63 Hz. A mean cardiac output was calculated 15 min before and 15 min after the arrows ( $\dot{Q}_{\text{base}}$ , 12.7 ml kg<sup>-1</sup> min<sup>-1</sup>) and between the arrows ( $\dot{Q}_{\text{drop}}$ , 11.2 ml kg<sup>-1</sup> min<sup>-1</sup>). The difference ( $\dot{Q}_{\text{base}} - \dot{Q}_{\text{drop}}$ ) of 1.5 ml kg<sup>-1</sup> min<sup>-1</sup> was used to estimate the rate of oxygen consumption ( $\dot{M}_{\text{O}_2}$ ) (3.3  $\mu\text{mol kg}^{-1} \text{min}^{-1}$ ) from Fig. 4. The percentage of metabolic costs of the total metabolic scope and activity scope were determined to be 3.4% and 5.6% respectively.

trauma. A detailed time course following surgery has not been previously reported; accordingly,  $f_{\text{H}}$  may still be a very useful tool for estimating metabolic rate if full post-operative recovery is achieved before calibration and experimentation. Heart rate is the conventional cardiovascular variable recorded but, except for a study on frogs (Dumsday, 1990), there are few data describing its long-term variation. A number of factors influence the metabolic *status quo*, and it has long been postulated that confinement and external stimuli can be major causes of stress to animals. Gamperl *et al.* (1994) have shown that cannulated trout in 'black-box' confinement have elevated levels of plasma cortisol and catecholamines, and the time course to reach resting levels is 6–8 days post-confinement. In our study, a similar time course was observed for the  $\dot{M}_{\text{O}_2}$  versus  $f_{\text{H}}$  relationship (Figs 5, 7), with  $f_{\text{H}}$  taking upwards of 8–10 days to stabilize. As  $f_{\text{H}}$  is influenced adrenergically in cod (Farrell, 1984; Fritsche and Nilsson, 1990), our  $f_{\text{H}}$  results are consistent with the hormonal data of Gamperl *et al.* (1994). An

obvious implication is that fish must be given approximately 1 week to recover from surgical procedures before meaningful measurements can be made. Most earlier studies have acclimated fish for 24 h or less before measuring  $\dot{M}_{\text{O}_2}$  and other cardiac variables, and this is clearly not sufficient in cod. For instance, a study designed to examine the relative contributions of  $f_{\text{H}}$  and  $V_{\text{s}}$  to increases in  $\dot{Q}$  during exercise might, on the basis of abnormally high values of  $f_{\text{H}}$  24 h after surgery (Fig. 7), erroneously conclude that  $f_{\text{H}}$  plays little or no role.

Very few studies have reported  $\dot{Q}$  for controlled levels of exercise (Stevens and Randall, 1967; Kiceniuk and Jones, 1977; Davie and Forster, 1980; Kolok *et al.* 1993; Keen and Farrell, 1994; Thorarensen *et al.* 1996b; Korsmeyer *et al.* 1997a), and no studies have measured  $\dot{Q}$  directly in relation to oxidative metabolism in fish. Our measurements show that  $\dot{Q}$  increased by almost 200% at 10 °C from rest to near-maximum exercise, a rise similar in magnitude to that in  $\dot{Q}$  during a swim to the critical swimming speed ( $U_{\text{crit}}$ ) in the rainbow trout (*Oncorhynchus mykiss*) (Kiceniuk and Jones, 1977). The percentage increase in  $\dot{Q}$  at 10 °C as swimming speed increased from 0 to 0.67 body length s<sup>-1</sup> in cod was 100% in this study compared with 47% in a study by Axelsson and Nilsson (1986) and 57% in a study by Axelsson (1988). There are, however, a number of differences between these studies. The cod used by Axelsson and Nilsson (1986) and Axelsson (1988) weighed 0.5–0.6 kg compared with the 2 kg cod used in the present study, and the scaling effect between mass and  $\dot{Q}$  is unknown. Also, their cod were from North Sea populations considered genetically distinct from the Scotian Shelf cod used in this study (Pogson *et al.* 1995). North Sea cod inhabit water of warmer annular temperatures. Also, our highest  $\dot{Q}$  values were recorded at least 2 or 3 days after surgery.

With few exceptions, increases in  $\dot{Q}$  were brought about by increases in both stroke volume ( $V_{\text{s}}$ ) and  $f_{\text{H}}$ , with  $V_{\text{s}}$  predominating. In the present study, the percentage contributions to  $\dot{Q}$  by  $f_{\text{H}}$  and  $V_{\text{s}}$  for all 5 °C and 10 °C data were 35% and 65%, respectively (42 and 58%, respectively, calculated from Axelsson and Nilsson, 1986; Axelsson, 1988). Our measurements of  $V_{\text{s}}$  at rest (0.45 ml kg<sup>-1</sup>) and during exercise (0.88 ml kg<sup>-1</sup>) are consistent with values reported in other studies (Hart, 1943; Kiceniuk and Jones, 1977; Kolok *et al.* 1993; Takeda, 1993; Keen and Farrell, 1994; Thorarensen *et al.* 1996b). This means that  $V_{\text{s}}$  largely accounts for the differences in  $\dot{Q}$  during exercise in cod. Thus, the predominantly  $V_{\text{s}}$ -modulated increase in  $\dot{Q}$  in cod contrasts markedly with the situation in higher vertebrates, where increases in  $\dot{Q}$  are primarily frequency-modulated. Frequency modulation is thought to be an advantage in higher vertebrates. Amphibians and reptiles have two atria and one ventricle. With this design, arterial and venous blood depend on laminar flow to keep them from mixing, and large increases in  $V_{\text{s}}$  might cause undesirable mixing of the venous and arterial bloodstreams (Satchell, 1991).

Data on rates of oxygen consumption and cardiac output for cod from this study and for other fish species are shown in Fig. 9. Although cardiac output in the other studies was

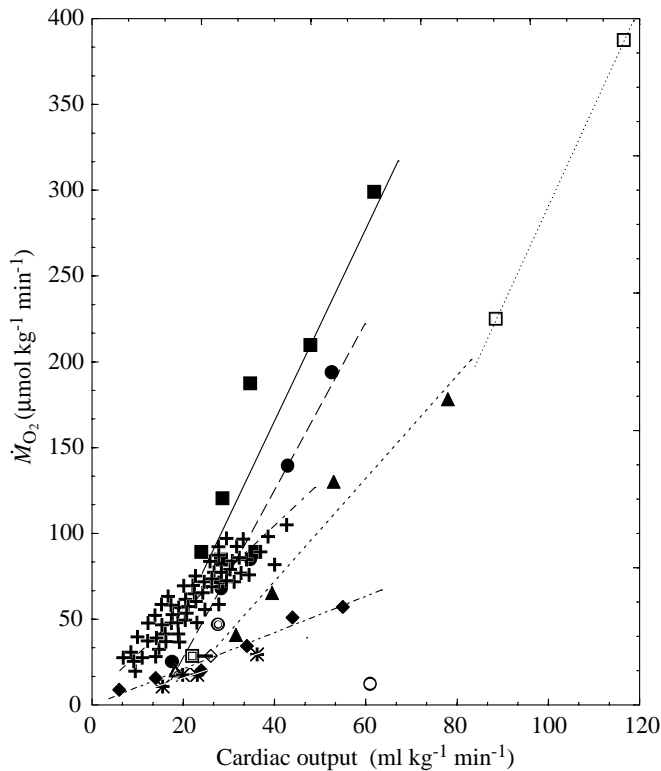

Fig. 9. The relationship between the rate of oxygen consumption ( $\dot{M}_{O_2}$ ) and cardiac output ( $\dot{Q}$ ) for various fish species. Cardiac output values in this study were measured directly using a Doppler ultrasonic probe. The remaining data were estimated using the Fick principal, based on arterial-venous blood oxygen content difference and whole-body oxygen consumption or by combining data for a species from different publications. Data were taken directly or calculated from other studies. Open squares, yellowfin tuna (*Thunnus albacares*) at 24–25 °C (Korsmeyer *et al.* 1997a,b; Dewar and Graham, 1994) ( $\dot{M}_{O_2} = -286.8 + 5.8\dot{Q}$ ,  $N=2$ ); filled squares, albacore tuna (*Thunnus alalunga*) at 22 °C (White *et al.* 1988) ( $\dot{M}_{O_2} = -54.9 + 5.61\dot{Q}$ ,  $N=7$ ,  $r^2=0.81$ ,  $P<0.05$ ); filled circles, rainbow trout (*Oncorhynchus mykiss*) at 9–10.5 °C (Kiceniuk and Jones, 1977) ( $\dot{M}_{O_2} = -68.6 + 4.84\dot{Q}$ ,  $N=5$ ,  $r^2=0.97$ ,  $P<0.001$ ); filled triangles, carp (*Cyprinus carpio*) at 24–25 °C (Takeda, 1993) ( $\dot{M}_{O_2} = -96.9 + 4.24\dot{Q}$ ,  $N=5$ ,  $r^2=0.94$ ,  $P<0.05$ ); open triangle, carp (*Cyprinus carpio*) at 10 °C (Garey, 1970); plus signs, Atlantic cod (*Gadus morhua*) at 5 and 10 °C (this study) ( $\dot{M}_{O_2} = 5.6 + 2.46\dot{Q}$ ,  $N=206$  from seven cod,  $r^2=0.86$ ,  $P<0.0001$ ); asterisks, winter flounder (*Pseudopleuronectes americanus*) at 5–10 °C (Cech *et al.* 1976) ( $\dot{M}_{O_2} = 0.469 + 0.831\dot{Q}$ ,  $N=5$ ,  $r^2=0.93$ ,  $P<0.01$ ); filled diamonds, Pacific dogfish (*Squalus suckleyi*) at 6–10 °C (Hanson and Johansen, 1970) ( $\dot{M}_{O_2} = 0.09 + 1.052\dot{Q}$ ,  $N=6$ ,  $r^2=0.96$ ,  $P<0.001$ ); open diamond, Pacific dogfish (*Squalus suckleyi*) at 11 °C (Lenfant and Johansen, 1966); double open square, dogfish (*Scyliorhinus stellaris*) at 16 °C (Baumgarten-Schulmann and Piiper, 1968); minus sign, dogfish (*Squalus acanthias*) at 12 °C (Robin *et al.* 1966); double circle, shorthorn sculpin (*Myoxocephalus scorpius*) at 15–18 °C (Goldstein *et al.* 1964); open circle, haemoglobinless Antarctic fish (*Chanocephalus aceratus*) at 0.3–1.4 °C (Holeton, 1970).

calculated using the Fick equation, it is clear that cardiac output can be used to estimate the rate of oxygen consumption for both

sluggish and active fish species. Animals that have high metabolic requirements have high cardiac outputs (Farrell and Jones, 1992), and their  $\dot{M}_{O_2}$  versus  $\dot{Q}$  slopes are steeper (Fig. 9).

#### High-resolution measurements of activity

An advantage of the Doppler flow measurement technique is that small and low-frequency metabolic events can be detected. Generally, while resting, cod spontaneously beat their pectoral or caudal fins for short periods and, as a result, a true resting heart rate is difficult to measure. The response of  $\dot{Q}$  to the beating pectoral fins was similar to that observed when a cod flexes its tail and starts to swim. Oxygen measurements, at the level of resolution described here, would not reveal subtle activities of this kind. If our assumptions are correct, this means that for free-swimming fish it will be possible to measure  $\dot{Q}$  in low-frequency events and to estimate with high accuracy the metabolic cost to the animal. This, in turn, will mean more accurate bioenergetic estimates. It may also prove useful in this and other species in determining the energetic costs of various behaviours (e.g. reproduction, courtship, territorial defence).

#### The effects of temperature on $\dot{M}_{O_2}$ and cardiac variables

Cardiac and swimming performance is greatly affected by temperature (Keen and Farrell, 1994), and if exercise is linked to cardiac performance one would expect similar trends between metabolic rate and cardiac variables. The increased metabolic demands during exercise are met through complex interactions between ventilation volume and frequency, blood oxygen content and  $\dot{Q}$ . Both standard and active metabolic rates were lower at 5 °C than at 10 °C. The  $Q_{10}$  for  $\dot{M}_{O_2}$  from 5 to 10 °C was 2.5 at rest and 2.1 at high levels of activity. Acute and chronic changes in temperature are expected to affect  $\dot{Q}$ ; a  $Q_{10}$  of 1.0 would indicate complete temperature compensation and a  $Q_{10}$  of 2.0 would indicate temperature conformity. The  $Q_{10}$  values of  $\dot{Q}$  and  $fH$  from 5 to 10 °C were 1.65 and 2.93 for rest and 1.22 and 1.97 for near-maximum activity, respectively. In both cases,  $fH$  was the more temperature-dependent component of  $\dot{Q}$ . Therefore, the reduction in  $\dot{Q}$  with lower temperature was attributable mostly to a large reduction in  $fH$ . This sensitivity of  $fH$  to temperature has been observed in other studies (Armstrong, 1986; Gehrke and Fielder, 1988; Kolok *et al.* 1993; Keen and Farrell, 1994; Claireaux *et al.* 1995a), and there is considerable variability among species. The large reduction in  $fH$  from 10 to 5 °C was partially compensated by an increase in  $V_s$  (i.e. stroke volume was higher at 5 °C than at 10 °C).

Temperature is a strong determinant of the  $\dot{M}_{O_2}$  versus  $fH$  relationship. Heart rate demonstrated a greater thermal dependence, compared with  $V_s$ , and it is well known that temperature affects  $fH$  directly through changes in pacemaker rate and response to modulators (Farrell, 1984). Therefore, one should not necessarily expect  $fH$  to follow metabolic rate if pacemaker rate is influenced by the interplay of a variety of effector mechanisms. Claireaux *et al.* (1995a) also report  $\dot{M}_{O_2}$  versus  $fH$  relationships for cod at 5 °C and describe left and right shifts in the intercept when cod are exposed to 2.5 and



7.5 °C, respectively. The  $\dot{M}_{O_2}$  versus  $f_H$  relationship at 5 °C for cod from this study closely matches the data from Claireaux *et al.* (1995a) for cod from the same geographical region.

The  $Q_{10}$  for  $\dot{Q}$  from 5 to 10 °C (1.65) was lower than the  $Q_{10}$  for  $\dot{M}_{O_2}$  (2.5). According to the Fick equation, this would mean that, at the lower temperature, the arterial-venous oxygen content difference is smaller. With lower metabolic demands at lower temperatures, cod probably maintain a high arterial blood oxygen content but remove less oxygen from the blood while lowering  $\dot{Q}$  by only a small amount.

Stroke volume at rest was only slightly lower at 10 °C ( $V_s=0.45$  ml kg<sup>-1</sup>) than at 5 °C ( $V_s=0.52$  ml kg<sup>-1</sup>) ( $P>0.05$ ;  $N=7$ ). At high activity, the lower  $V_s$  at 10 °C ( $V_s=0.88$  ml kg<sup>-1</sup> versus 1.12 ml kg<sup>-1</sup> at 5 °C;  $P<0.05$ ;  $N=7$ ) can simply be interpreted as either cardiac filling time being compromised because of higher contraction frequency or a reduction in the force of contraction at high frequency (Farrell *et al.* 1989).

#### $\dot{M}_{O_2}$ and swimming speed

Our observations also permit conclusions about the relationship between swimming speed and the rate of oxygen consumption ( $\dot{M}_{O_2}$ ) in cod, which has been described by a number of authors. Our  $\dot{M}_{O_2}$  values for standard (22 and 35  $\mu\text{mol O}_2 \text{ kg}^{-1} \text{ min}^{-1}$ ) and active (72 and 97  $\mu\text{mol O}_2 \text{ kg}^{-1} \text{ min}^{-1}$ ) metabolic rate at 5 and 10 °C for cod of 2 kg closely match the  $\dot{M}_{O_2}$  observed by Saunders (1963) (20.2 and 35  $\mu\text{mol O}_2 \text{ kg}^{-1} \text{ min}^{-1}$  at 3 and 10 °C, respectively) and Edwards *et al.* (1972) (33.3  $\mu\text{mol O}_2 \text{ kg}^{-1} \text{ min}^{-1}$  at 12 °C) for routine metabolism of unfed Bay of Fundy cod and fall between the values reported by Nelson *et al.* (1994, 1996), Reidy *et al.* (1995) and Tang *et al.* (1994) at 2, 5 and 15 °C for the same stock of fish (16.1, 31.5 and 60  $\mu\text{mol O}_2 \text{ kg}^{-1} \text{ min}^{-1}$  for standard metabolic rate and 54, 76 and 108  $\mu\text{mol O}_2 \text{ kg}^{-1} \text{ min}^{-1}$  for active metabolic rate at 2, 5 and 15 °C respectively). The major difference between the present study and the others is that the cod in our study spent up to 8–16 weeks in the respirometer. This may account for the observed low resting and standard  $\dot{M}_{O_2}$  values. In the present study,  $\dot{M}_{O_2}$  increased exponentially with swimming speed (Fig. 3). An exponential relationship between swimming speed and  $\dot{M}_{O_2}$  is expected because, in fish, the predominant inertial drag forces opposing forward momentum increase as a power function as swimming speed increases linearly (Webb, 1978). Some studies report linear relationships, probably because  $\dot{M}_{O_2}$  measurements at low swimming speeds are inflated due to animal stress or hyperactivity. Although we did not determine maximum  $\dot{M}_{O_2}$  at the critical swimming speed, the observed facultative scopes for activity were 50 and 62  $\mu\text{mol O}_2 \text{ kg}^{-1} \text{ min}^{-1}$ , and active metabolic rate was 3.3 and 2.8 times the extrapolated standard metabolic rate values at 5 and 10 °C respectively.

To conclude, our results clearly show that cardiac output rather than  $f_H$  is the physiological correlate that will permit the most accurate estimates of metabolic rate in free-swimming fish. Cardiac output very accurately represents the metabolic rate of exercising cod and will be useful as a measure of

metabolic costs resulting from other physiological processes. We are currently designing an ultrasonic cardiac output transmitter that will make it possible to estimate the metabolic rates of free-swimming fish in the field.

We thank Todd Bishop for his technical assistance and the staff of the Aquatron (Dalhousie University, Halifax) for providing us with excellent working conditions. We are most grateful to Dr C. H. Clark, the university veterinarian, for his surgical and antibiotic expertise. We also thank Dr A. Pinder for the loan of the Doppler blood flow meter and Martha Krohn for constructive criticism and technical assistance. Funding for this research was provided by a Strategic grant to S.R.K. by the Natural Sciences and Engineering Research Council of Canada. Resource funding was also provided by Cambridge University to D.M.W.

#### References

- ARMSTRONG, J. D. (1986). Heart rate as an indicator of activity, metabolic rate, food intake and digestion in pike: *Esox lucius*. *J. Fish Biol.* **29**, 207–221.
- ARMSTRONG, J. D. (1998). Relationships between heart rate and metabolic rate of pike: integration of existing data. *J. Fish Biol.* **52**, 362–368.
- AXELSSON, M. (1988). The importance of nervous and humoral mechanisms in the control of cardiac performance in the Atlantic cod, *Gadus morhua*, at rest and during non-exhaustive exercise. *J. exp. Biol.* **137**, 287–303.
- AXELSSON, M. AND NILSSON, S. (1986). Blood pressure regulation during exercise in the Atlantic cod, *Gadus morhua*. *J. exp. Biol.* **126**, 225–236.
- BAUMGARTEN-SCHULMANN, D. AND PIIPER, J. (1968). Gas exchange in the gills of resting unanesthetized dogfish *Scyliorhinus stellaris*. *Respir. Physiol.* **5**, 317–325.
- BEVAN, R. M., WOAKES, A. J., BUTLER, P. J. AND CROXALL, J. P. (1995). Heart rate and oxygen consumption of exercising gentoo penguins. *Physiol. Zool.* **68**, 855–877.
- BOISCLAIR, D. AND LEGGETT, W. C. (1989). The importance of activity in bioenergetics models applied to actively foraging fishes. *Can. J. Fish. Aquat. Sci.* **46**, 1859–1867.
- BRETT, J. R. (1964). The respiratory metabolism and swimming performance of young sockeye salmon. *J. Fish. Res. Bd Can.* **21**, 1183–1226.
- BRETT, J. R. AND GLASS, N. R. (1973). Metabolic rates and critical swimming speeds of sockeye salmon (*Oncorhynchus nerka*) in relation to size and temperature. *J. Fish. Res. Bd Can.* **30**, 379–387.
- BUTLER, P. J. (1993). To what extent can heart rate be used as an indicator of metabolic rate in free-living marine mammals? *Symp. zool. Soc. Lond.* **66**, 317–332.
- BUTLER, P. J., BEVAN, R. M., WOAKES, A. J., CROXALL, J. P. AND BOYD, I. L. (1995). The use of data loggers to determine the energetics and physiology of aquatic birds and mammals. *Braz. J. med. Biol. Res.* **28**, 1307–1317.
- CECH, J. J., BRIDGES, D. W., ROWELL, D. M. AND BALZER, P. J. (1976). Cardiovascular responses of winter flounder, *Pseudopleuronectes americanus* (Walbaum), to acute temperature increase. *Can. J. Zool.* **54**, 1383–1388.
- CLAIREAUX, G., WEBBER, D. M., KERR, S. R. AND BOUTILIER, R. G. (1995a). Physiology and behaviour of free-swimming Atlantic cod

- (*Gadus morhua*) facing fluctuating temperature conditions. *J. exp. Biol.* **198**, 49–60.
- CLAIREAUX, G., WEBBER, D. M., KERR, S. R. AND BOUTILIER, R. G. (1995b). Physiology and behaviour of free-swimming Atlantic cod (*Gadus morhua*) facing fluctuating salinity and oxygenation conditions. *J. exp. Biol.* **198**, 61–69.
- DAVIE, P. S. AND FORSTER, M. E. (1980). Cardiovascular responses to swimming in eels. *Comp. Biochem. Physiol.* **67A**, 367–373.
- DEWER, H. AND GRAHAM, J. B. (1994). Studies of tropical tuna swimming performance in a large water tunnel. I. Energetics. *J. exp. Biol.* **192**, 13–31.
- DUMSDAY, B. (1990). Resting heart rate of the toad *Bufo marinus*: A long-term study of individual differences and environmental influences. *Physiol. Zool.* **63**, 420–431.
- EDWARDS, R. R. C., FINLAYSON, D. M. AND STEELE, J. H. (1972). An experimental study of the oxygen consumption, growth and metabolism of the cod (*Gadus morhua* L.). *J. exp. mar. Biol. Ecol.* **8**, 299–309.
- FARRELL, A. P. (1984). A review of cardiac performance in the teleost heart: intrinsic and humoral regulation. *Can. J. Zool.* **62**, 523–536.
- FARRELL, A. P. AND JONES, D. R. (1992). The heart. In *Fish Physiology*, vol. 12A (ed. W. S. Hoar, D. J. Randall and A. P. Farrell), pp. 1–88. San Diego: Academic Press.
- FARRELL, A. P., SMALL, S. AND GRAHAM, M. S. (1989). Effect of heart rate and hypoxia on the performance of a perfused trout heart. *Can. J. Zool.* **67**, 274–280.
- FRICTSHE, R. AND NILSSON, S. (1990). Autonomic nervous control of blood pressure and heart rate during hypoxia in the cod, *Gadus morhua*. *J. comp. Physiol. B* **160**, 287–292.
- GAMPERL, A. K., VIJAYAN, M. M. AND BOUTILIER, R. G. (1994). Epinephrine, norepinephrine and cortisol concentrations in cannulated seawater-acclimated rainbow trout (*Oncorhynchus mykiss*) following black-box confinement and epinephrine injection. *J. Fish Biol.* **45**, 313–324.
- GAREY, W. (1970). Cardiac output of the carp (*Cyprinus carpio*). *Comp. Biochem. Physiol.* **33**, 181–189.
- GEHRKE, P. C. AND FIELDER, D. R. (1988). Effects of temperature and dissolved oxygen on heart rate, ventilation rate and oxygen consumption of spangled perch, *Leiopotherapon unicolor* (Gunther 1859) (Percoidei, Teraponidae). *J. comp. Physiol. B* **157**, 771–782.
- GOLDSTEIN, L., FORSTER, R. P. AND FANELLI, G. M., SR (1964). Gill blood flow and ammonia excretion in the marine teleost (*Myoxocephalus scorpius*). *Comp. Biochem. Physiol.* **12**, 489–499.
- HANSEN, M. J., BOISCLAIR, D., BRANDT, S. B., HEWETT, S. W., KITCHELL, J. F., LUCAS, M. C. AND NEY, J. J. (1993). Applications of bioenergetics models to fish ecology and management: Where do we go from here? *Trans. Am. Fish. Soc.* **122**, 1019–1030.
- HANSON, D. AND JOHANSEN, K. (1970). Relationship of gill ventilation and perfusion in Pacific dogfish, *Squalus suckleyi*. *J. Fish. Res. Bd Can.* **27**, 551–564.
- HART, J. S. (1943). The cardiac output of four freshwater fish. *Can. J. Res.* **21D**, 77–84.
- HEWETT, S. W. (1989). Ecological applications of bioenergetic models. *Am. Fish. Soc. Symp.* **6**, 113–120.
- HOLETON, G. F. (1970). Oxygen uptake and circulation by a hemoglobinless antarctic fish (*Chaenocephalus aceratus* Lonnberg) compared with three red-blooded antarctic fish. *Comp. Biochem. Physiol.* **34**, 457–471.
- KEEN, J. E. AND FARRELL, A. P. (1994). Maximum prolonged swimming speed and maximum cardiac performance of rainbow trout, *Oncorhynchus mykiss*, acclimated to two different water temperatures. *Comp. Biochem. Physiol.* **108A**, 287–295.
- KERR, S. R. (1982). Estimating the energy budgets of actively predatory fishes. *Can. J. Fish. Aquat. Sci.* **39**, 371–379.
- KERR, S. R. AND DICKIE, L. M. (1985). Bioenergetics of 0+ Atlantic herring (*Clupea harengus harengus*). *Can. J. Fish. Aquat. Sci.* **42**, 105–110.
- KICENIUK, J. W. AND JONES, D. R. (1977). The oxygen transport system in trout (*Salmo gairdneri*) during sustained exercise. *J. exp. Biol.* **69**, 247–260.
- KITCHELL, J. F., STEWART, D. J. AND WEININGER, D. (1977). Applications of a bioenergetics model to yellow perch (*Perca flavescens*) and walleye (*Stizostedion vitreum vitreum*). *J. Fish. Res. Bd Can.* **34**, 1922–1935.
- KOLOK, A. S., SPOONER, M. R. AND FARRELL, A. P. (1993). The effect of exercise on the cardiac output and blood flow distribution of the largescale sucker *Catostomus macrocheilus*. *J. exp. Biol.* **183**, 301–321.
- KORSMEYER, K. E., LAI, N. C., SHADWICK, R. E. AND GRAHAM, J. B. (1997a). Heart rate and stroke volume contributions to cardiac output in swimming yellowfin tuna: response to exercise and temperature. *J. exp. Biol.* **200**, 1975–1986.
- KORSMEYER, K. E., LAI, N. C., SHADWICK, R. E. AND GRAHAM, J. B. (1997b). Oxygen transport and cardiovascular responses to exercise in the yellowfin tuna *Thunnus albacares*. *J. exp. Biol.* **200**, 1987–1997.
- KROHN, M., REIDY, S. AND KERR, S. (1997). Bioenergetic analysis of the effects of temperature and prey availability on growth and condition of northern cod (*Gadus morhua*). *Can. J. Fish. Aquat. Sci.* **54** (Suppl. 1), 113–121.
- LENFANT, C. AND JOHANSEN, K. (1966). Respiratory function in the elasmobranch *Squalus suckleyi*. *Respir. Physiol.* **1**, 13–29.
- LUCAS, M. C. (1994). Heart rate as an indicator of metabolic rate and activity in adult Atlantic salmon, *Salmo salar*. *J. Fish Biol.* **44**, 889–903.
- LUCAS, M. C., JOHNSTONE, A. D. AND PRIEDE, I. G. (1993). Use of physiological telemetry as a method of estimating metabolism of fish in the natural environment. *Trans. Am. Fish. Soc.* **122**, 822–833.
- LUCAS, M. C., PRIEDE, I. G., ARMSTRONG, J. D., GINDY, A. N. Z. AND DE VERA, L. (1991). Direct measurements of metabolism, activity and feeding of pike, *Esox lucius* L., in the wild, by the use of heart rate telemetry. *J. Fish Biol.* **39**, 325–345.
- NELSON, J. A., TANG, Y. AND BOUTILIER, R. G. (1994). Differences in exercise physiology between two Atlantic cod (*Gadus morhua*) populations from different environments. *Physiol. Zool.* **67**, 330–354.
- NELSON, J. A., TANG, Y. AND BOUTILIER, R. G. (1996). The effects of salinity change on the exercise performance of two Atlantic cod (*Gadus morhua*) populations inhabiting different environments. *J. exp. Biol.* **199**, 1295–1309.
- NEY, J. J. (1993). Bioenergetics modeling today: Growing pains on the cutting edge. *Trans. Am. Fish. Soc.* **122**, 736–748.
- POGSON, G. H., MESA, K. A. AND BOUTILIER, R. G. (1995). Genetic population structure and gene flow in the Atlantic cod *Gadus morhua*: a comparison of allozyme and RFLP loci. *Genetics* **139**, 375–385.
- PRIEDE, I. G. (1983). Heart rate telemetry from fish in the natural environment. *Comp. Biochem. Physiol.* **76A**, 515–524.
- PRIEDE, I. G. AND TYTLER, P. (1977). Heart rate as a measure of metabolic rate in teleost fishes; *Salmo gairdneri*, *Salmo trutta* and *Gadus morhua*. *J. Fish Biol.* **10**, 231–242.

- PRIEDE, I. G. AND YOUNG, A. H. (1977). The ultrasonic telemetry of cardiac rhythms of wild free-living brown trout (*Salmo trutta* L.) as an indicator of bioenergetics and behaviour. *J. Fish Biol.* **10**, 299–318.
- RANDALL, D. J. (1968). Functional morphology of the heart in fishes. *Am. Zool.* **8**, 179–189.
- REIDY, S. P., NELSON, J. A., TANG, Y. AND KERR, S. R. (1995). Post-exercise metabolic rate in Atlantic cod and its dependence upon the method of exhaustion. *J. Fish Biol.* **47**, 377–386.
- ROBIN, E. D., MURDAUGH, H. V. AND MILLEN, J. E. (1966). Acid–base, fluid and electrolyte metabolism in the elasmobranch. III. Oxygen, CO<sub>2</sub>, bicarbonate and lactate exchange across the gill. *J. cell. Physiol.* **67**, 93–100.
- SATCHELL, G. H. (1991). *Physiology and Form of Fish Circulation*. Cambridge: Cambridge University Press.
- SAUNDERS, R. L. (1963). Respiration of the Atlantic cod. *J. Fish. Res. Bd Can.* **20**, 373–385.
- STEVENS, E. D. AND RANDALL, D. J. (1967). Changes in gas concentrations in blood and water during moderate swimming activity in rainbow trout. *J. exp. Biol.* **46**, 329–337.
- SUREAU, D. AND LAGARDERE, J. P. (1991). Coupling of heart rate and locomotor activity in sole, *Solea solea* (L.) and bass, *Dicentrarchus labrax* (L.), in their natural environment by using ultrasonic telemetry. *J. Fish Biol.* **38**, 399–405.
- TAKEDA, T. (1993). Effects of exercise-stress on ventilation, cardiac output and blood respiratory parameters in the carp, *Cyprinus carpio*. *Comp. Biochem. Physiol.* **106A**, 277–283.
- TANG, Y., NELSON, J. A., REIDY, S. P., KERR, S. R. AND BOUTILIER, R. G. (1994). A reappraisal of activity metabolism in Atlantic cod (*Gadus morhua*). *J. Fish Biol.* **44**, 1–10.
- THORARENSEN, H., GALLAUGHER, P. E. AND FARRELL, A. P. (1996a). The limitations of heart rate as a predictor of metabolic rate in fish. *J. Fish Biol.* **49**, 226–236.
- THORARENSEN, H., GALLAUGHER, P. AND FARRELL, A. P. (1996b). Cardiac output in swimming rainbow trout, *Oncorhynchus mykiss*, acclimated to seawater. *Physiol. Zool.* **69**, 139–153.
- WARDLE, C. S. AND KANWISHER, J. W. (1974). The significance of heart rate in free swimming cod, *Gadus morhua*: some observations with ultra-sonic tags. *Mar. Behav. Physiol.* **2**, 311–324.
- WEBB, P. W. (1974). Hydrodynamics and energetics of fish propulsion. *Bull. Fish. Res. Bd Can.* **190**, 1–159.
- WEBB, P. W. (1978). Hydrodynamics: non-scombroid fish. In *Fish Physiology* (ed. W. S. Hoar and D. J. Randall), pp. 189–237. New York: Academic Press.
- WEBBER, D. M. (1985). Monitoring the metabolic rate and activity of *Illex illecebrosus* with telemetered jet pressures. MS thesis, Dalhousie University. 123pp.
- WEBBER, D. M. AND O'DOR, R. K. (1986). Monitoring the metabolic rate and activity of free-swimming squid with telemetered jet pressure. *J. exp. Biol.* **126**, 205–224.
- WHITE, F. C., KELLY, R., KEMPER, S., SCHUMACKER, P. T., GALLAGHER, K. R. AND LAURS, M. R. (1988). Organ blood flow haemodynamics and metabolism of the albacore tuna *Thunnus alalunga* (Bonnaterre). *Exp. Biol.* **47**, 161–169.
